# Supplementary material for: Selection scan reveals three new loci related to high altitude adaptation in Native Andeans
Source: PubMed Central journal article supplement (PMC6109162; doi:10.1038/s41598-018-31100-6), 2018-08-24
Supplement: 41598_2018_31100_MOESM1_ESM.pdf [file 41598_2018_31100_MOESM1_ESM.pdf]

## *Supplementary Material*

### **Selection scan reveals three new loci related to high altitude adaptation in Native Andeans**

Vanessa C. Jacovas<sup>1†</sup>, Cainã M. Couto-Silva<sup>2†</sup>, Kelly Nunes<sup>2†</sup>, Renan B. Lemes<sup>2</sup>, Marcelo Z. de Oliveira<sup>3</sup>, Francisco M. Salzano<sup>1</sup>, Maria Cátira Bortolini<sup>1\*</sup> & Tábita Hünemeier<sup>2\*</sup>

<sup>1</sup>Genetics Department, Biosciences Institute, Federal University of Rio Grande do Sul, Porto Alegre, RS, Brazil.

<sup>2</sup>Department of Genetics and Evolutionary Biology, Biosciences Institute, University of São Paulo, São Paulo, SP, Brazil.

<sup>3</sup>Vale do Rio dos Sinos University, São Leopoldo, RS, Brazil.

†These authors contributed equally to this work.

\*Correspondence and requests for materials should be addressed to M.C.B. (email: [maria.bortolini@ufrgs.br](mailto:maria.bortolini@ufrgs.br)) or T.H. (email: [hunemeier@usp.br](mailto:hunemeier@usp.br))

TableS1. Significance of the PBS values for the extreme SNPs of each candidate gene, obtained for each simulated demographic model.

| SNP (Gene)                    | Constant Model | Bottleneck+Expansion | Bottleneck |
|-------------------------------|----------------|----------------------|------------|
| rs13411586 ( <i>SP100</i> )   | 0.0001         | 0.0143               | 0.0074     |
| rs10978240 ( <i>TMEM38B</i> ) | 0.0017         | 0.0248               | 0.0147     |
| rs1046778 ( <i>AS3MT</i> )    | 0.0047         | 0.0315               | 0.0192     |
| rs269866 ( <i>DUOX2</i> )     | 0.0001         | 0.0132               | 0.0060     |
| rs440191 ( <i>CLC</i> )       | 0.0056         | 0.0321               | 0.0206     |

Table S2. Allelic frequencies by Native American population analyzed in the present study (\*Weighted average).

| Population (n)                                            | <i>DUOX2</i> G allele (rs269866) | <i>SP100</i> C allele (rs13411586) | <i>CLC</i> G allele (rs440191) |
|-----------------------------------------------------------|----------------------------------|------------------------------------|--------------------------------|
| <b>Mesoamerican Lowland (&lt; 2,500 m.)</b>               |                                  |                                    |                                |
| Kaqchikel (13)                                            | 0                                | 0.042                              | 0                              |
| Maya (49)                                                 | 0                                | 0                                  | 0.138                          |
| Mixe (17)                                                 | 0.059                            | 0.029                              | 0.147                          |
| Mixtec (5)                                                | 0.100                            | 0.100                              | 0.100                          |
| Purepecha (1)                                             | 0                                | 0                                  | 0                              |
| Tepehuano (25)                                            | 0.240                            | 0.020                              | 0.080                          |
| Zapotec (43)                                              | 0.068                            | 0.114                              | 0.182                          |
| <b>Total (153)</b>                                        | <b>0.068*</b>                    | <b>0.045*</b>                      | <b>0.128*</b>                  |
| <b>South American (Andean) Highland (≥ 4,000 m.)</b>      |                                  |                                    |                                |
| Aymara (23)                                               | 0.457                            | 0.413                              | 0.500                          |
| Quechua (40)                                              | 0.400                            | 0.388                              | 0.425                          |
| <b>Total (63)</b>                                         | <b>0.420*</b>                    | <b>0.397*</b>                      | <b>0.452*</b>                  |
| <b>South American (Amazonian) Lowland (&lt; 2,500 m.)</b> |                                  |                                    |                                |
| Guahibo (6)                                               | 0                                | 0                                  | 0.250                          |
| Guarani (6)                                               | 0.083                            | 0                                  | 0.167                          |
| Jamamadi (1)                                              | 0                                | 0.500                              | 1                              |
| Kaingang (2)                                              | 0.500                            | 0                                  | 0                              |
| Karitiana (13)                                            | 0                                | 0.115                              | 0                              |
| Kogi (4)                                                  | 0                                | 0                                  | 0.375                          |
| Maleku (3)                                                | 0                                | 0                                  | 0                              |
| Palikur (3)                                               | 0                                | 0.167                              | 0.500                          |
| Parakana (1)                                              | 0                                | 0.500                              | 0                              |
| Piapoco (7)                                               | 0                                | 0                                  | 0.286                          |
| Surui (24)                                                | 0                                | 0                                  | 0                              |
| Teribe (3)                                                | 0                                | 0.333                              | 0                              |
| Ticuna (6)                                                | 0.167                            | 0                                  | 0.167                          |
| Toba (4)                                                  | 0.125                            | 0.125                              | 0.250                          |
| Waunana (3)                                               | 0                                | 0.167                              | 0.500                          |
| Wayuu (11)                                                | 0.056                            | 0                                  | 0.056                          |
| Wichi (5)                                                 | 0.200                            | 0                                  | 0.300                          |
| Yaghan (4)                                                | 0.125                            | 0.125                              | 0.250                          |
| <b>Total (106)</b>                                        | <b>0.048*</b>                    | <b>0.053*</b>                      | <b>0.142*</b>                  |

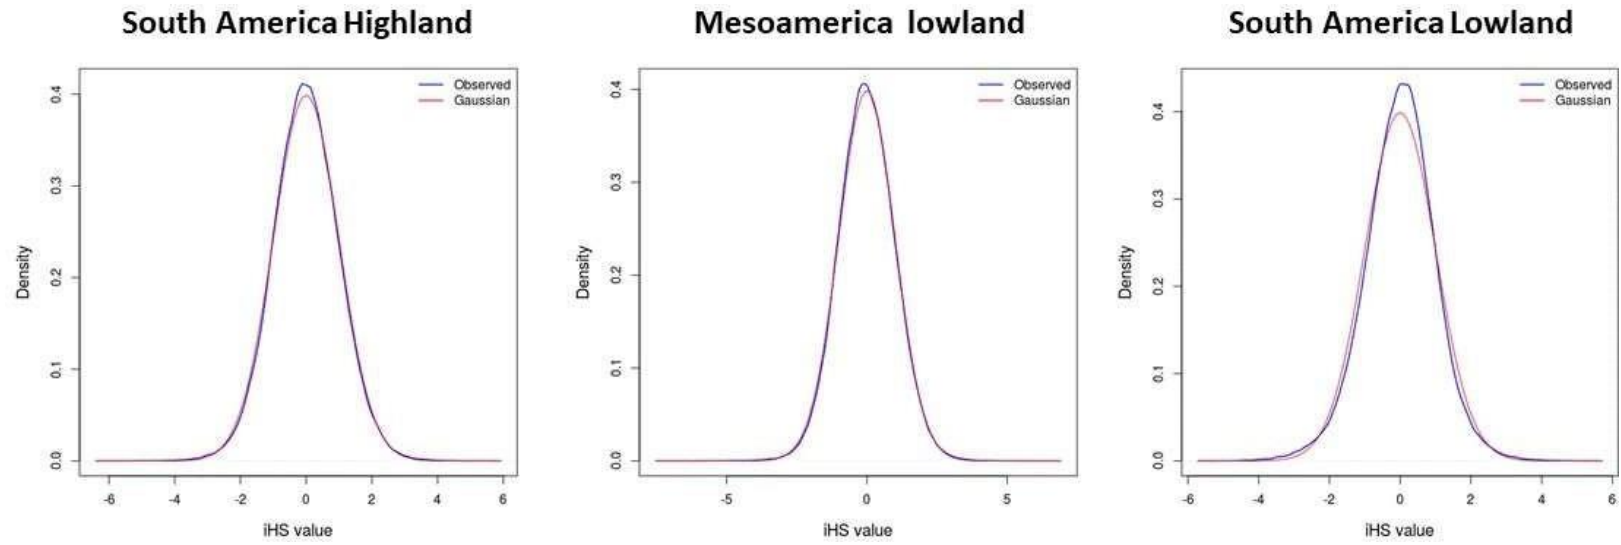

Figure S1. iHS value distribution patterns for all three groups (South American highland, South America Lowland and Mesoamerica Lowland).

|                                | Mean<br>(lowland) | Median<br>(lowland) | 95% c.i.         | Mean<br>(highland) |
|--------------------------------|-------------------|---------------------|------------------|--------------------|
| <i>SP100</i><br>(rs13411586 C) | 0.0656            | 0.0652              | (0.0481; 0.0854) | 0.3968             |
| <i>SP100</i><br>(rs9678342 C)  | 0.0637            | 0.0637              | (0.0466; 0.0838) | 0.3809             |
| <i>SP100</i><br>(rs7582700 T)  | 0.0965            | 0.0963              | (0.0745; 0.1196) | 0.3889             |
| <i>DUOX2</i><br>(rs269866 G)   | 0.0714            | 0.0714              | (0.0528; 0.0916) | 0.4206             |
| <i>CLC</i><br>(rs440191 A)     | 0.1332            | 0.1335              | (0.1071; 0.1599) | 0.4524             |

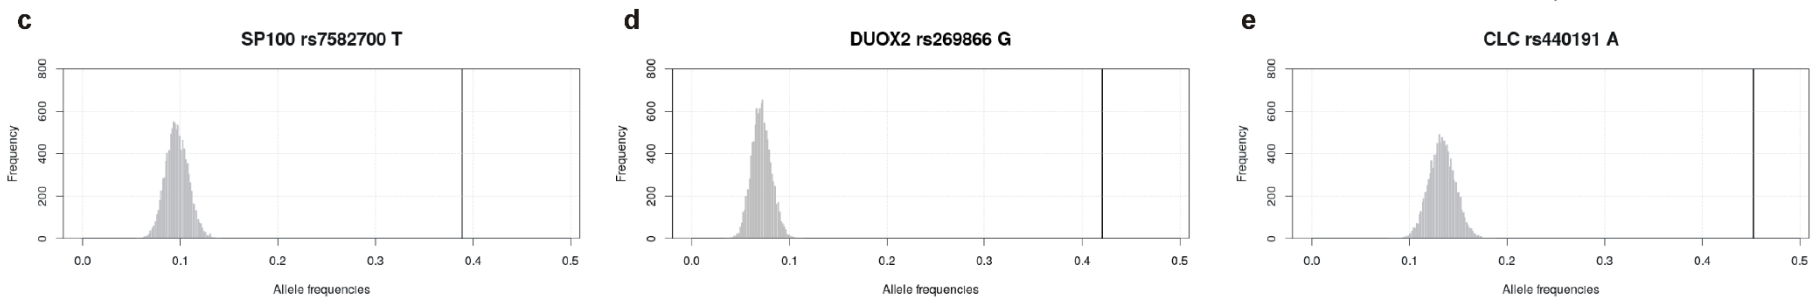

Figure S2. **Bootstrap simulations.** (A) Table showing average values (mean and median) of the allele frequencies for each SNP in lowland populations, as well as, their 95% confidence intervals obtained by simulation, and the average allele frequency of the candidate variant in highland populations. (B–F). Distribution of allele frequencies obtained by 10,000 simulations for lowlanders considering all markers in putative selection. The corresponding average allele frequencies observed for highland populations are represented by black vertical lines.

Thyroid eQTL 15\_45394406\_G\_A\_b37 ENSG00000259539.1

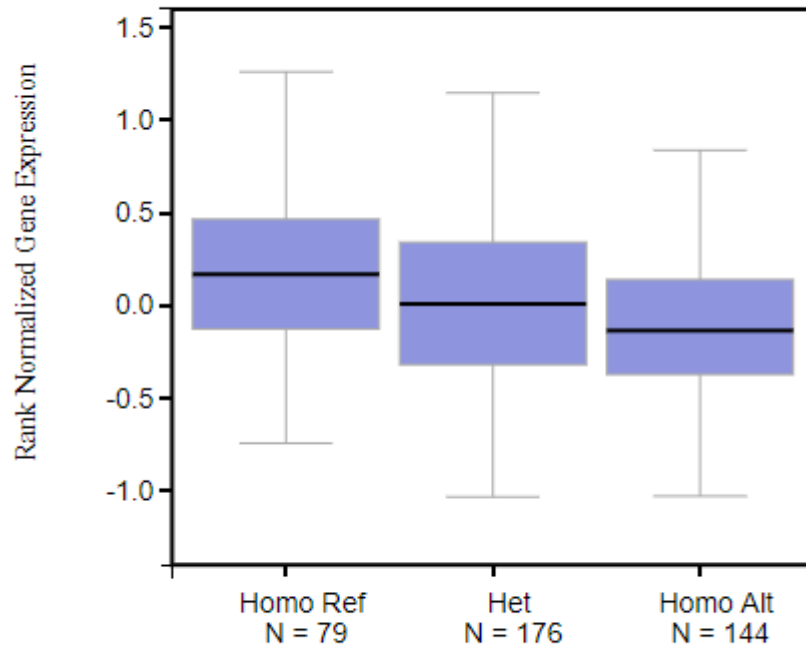

Figure S3. Differential expression of the DUOX2 putatively selected allele (rs269866 G) for a differential effect in gene expression in the thyroid tissue (<https://www.gtexportal.org/home/>, accessed 26/03/2018).

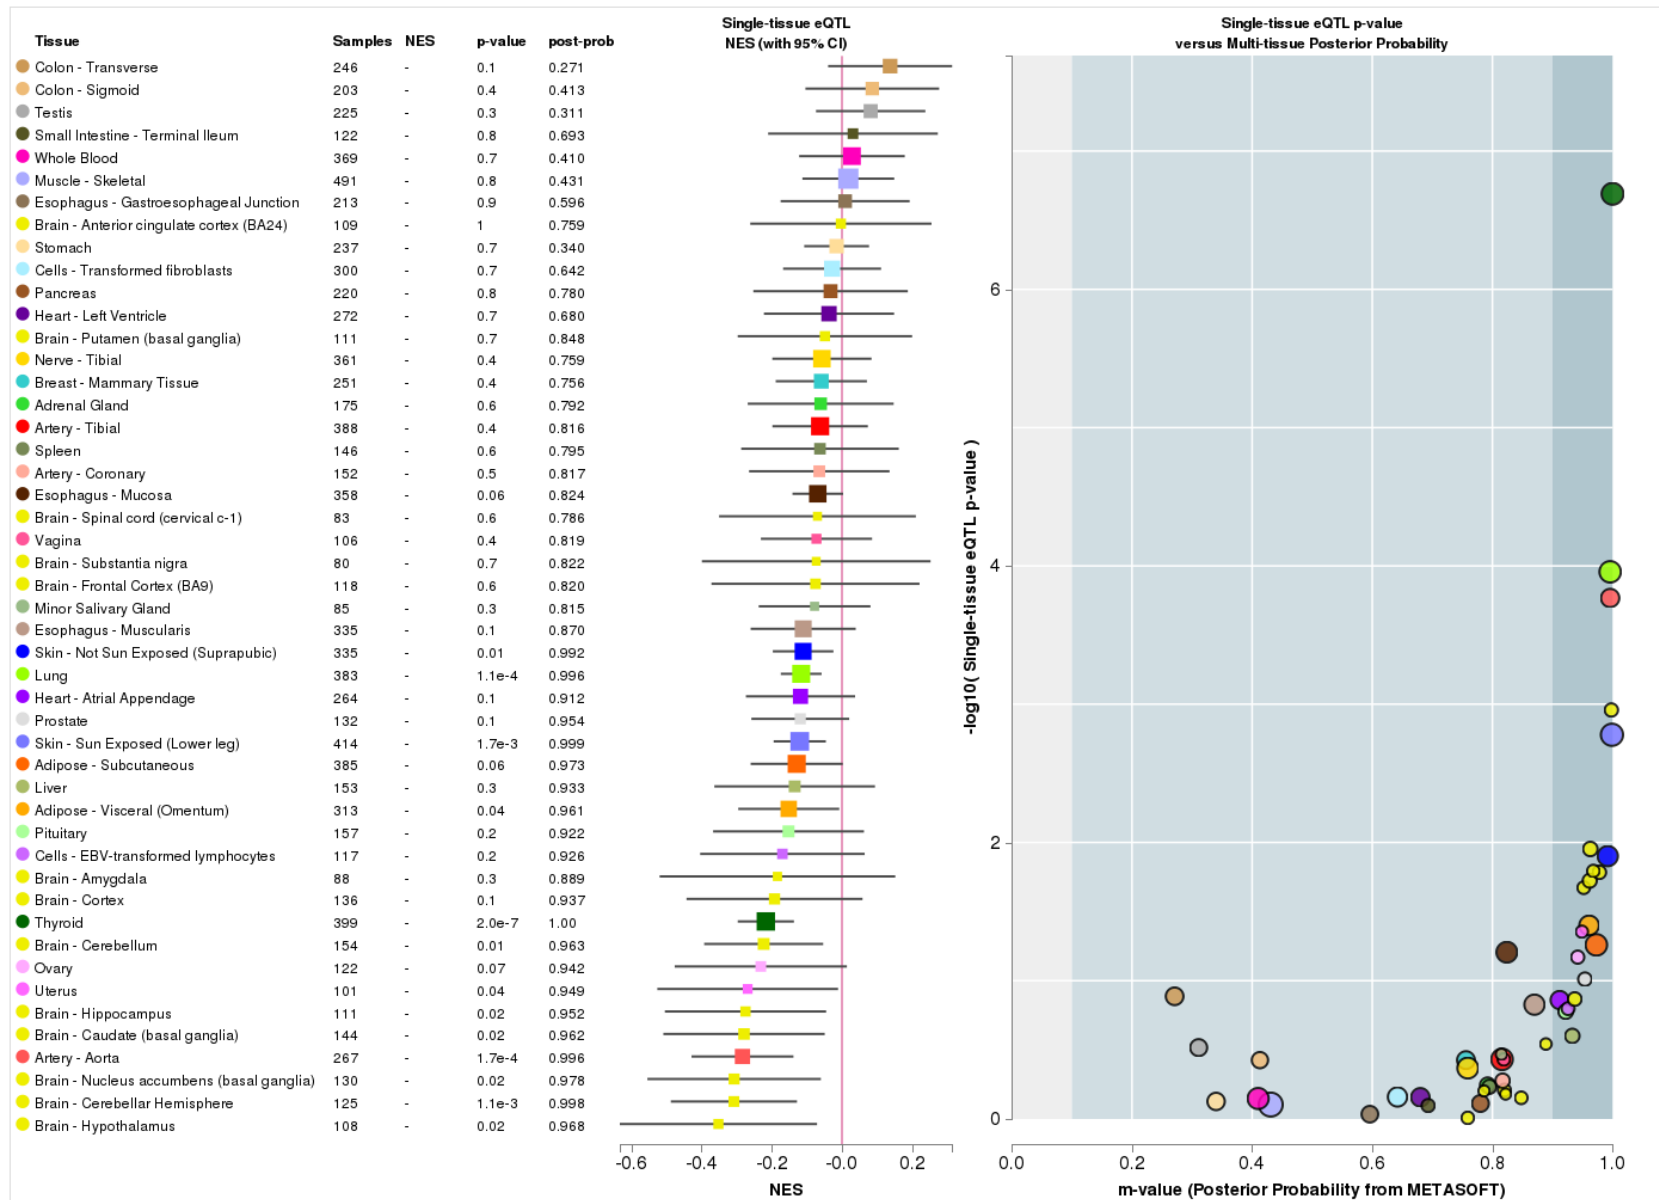

FigureS4. Posterior probabilities of DUOX2 putatively selected allele (rs269866 G) for a differential effect in gene expression in multiple tissues (<https://www.gtexportal.org/home/>, accessed 26/03/2018).

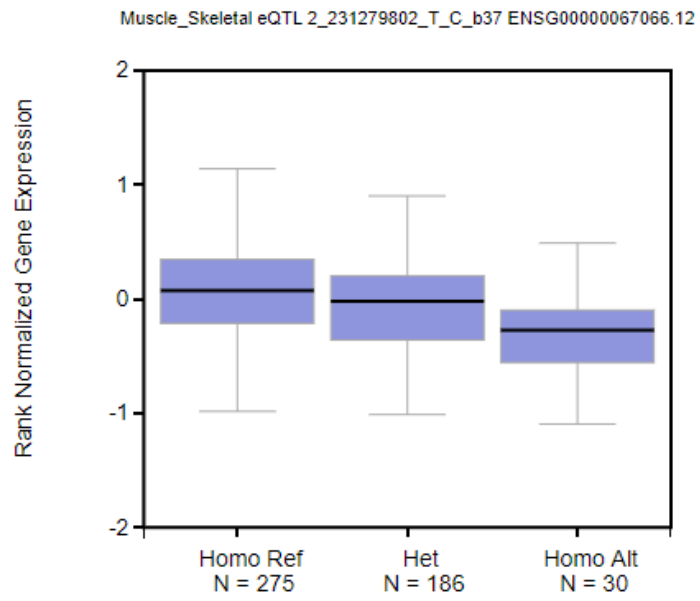

FigureS5. Differential expression of the SP100 putatively selected allele (rs13411586C) in the skeletal muscle (<https://www.gtexportal.org/home/>, accessed 26/03/2018).



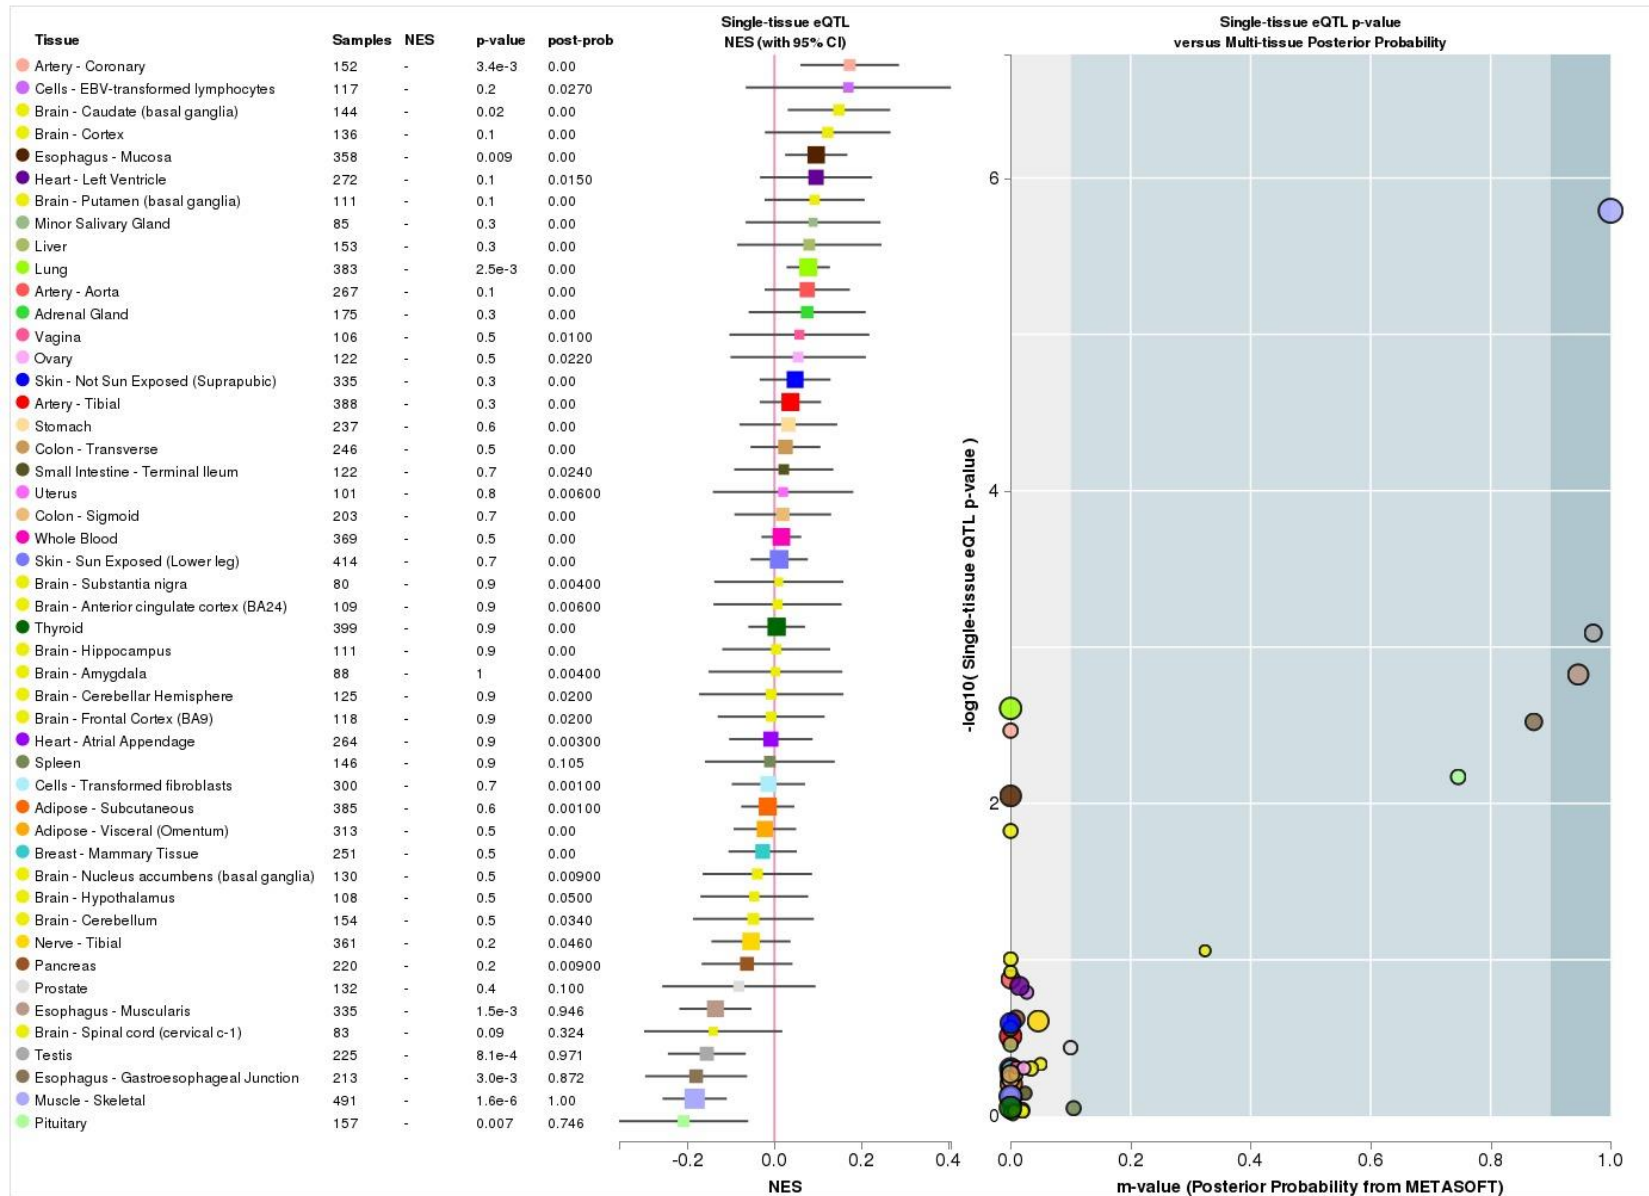

Figure S6. Posterior probabilities of SP100 putatively selected allele (rs13411586C) for a differential effect in gene expression in multiple tissues (<https://www.gtexportal.org/home/>, accessed 26/03/2018).
